# Supplementary material for: Crossing the divide: Use of health services during the handover period from child and adolescent to adult mental health services, 2008-2021. A Norwegian National register study.
Source: Research Square preprint supplement (doi:10.21203/rs.3.rs-8133858/v1), 2025-12-02
Supplement: Supplementary file 1 [file 4184129d220415d4fbb382c1.docx]

|  |  |  |  |  |
| --- | --- | --- | --- | --- |

| n= 1,313 077  (N= 11719710) | Contacts specialist mental health services    Mean (SD) | Contact General practitioner      Mean (SD) | Contact Out-of-hours GP        Mean (SD) | Contact somatic and acute somatic services  Mean (SD) | Contacts with a P diagnosis      Mean (SD) |
| --- | --- | --- | --- | --- | --- |
|  | 0.54 (3.12) | 1.55 (2.36) | 0.27 (0.73) | 0.51 (1.63) | 0.25 (1.26) |
| Sex |  |  |  |  |  |
| Female | 0.75 (3.77) | 1.97 (2.65) | 0.33 (0.83) | 0.30 (1.41) | 0.56 (1.76) |
| Male | 0.34 (2.34) | 1.18 (1.97) | 0.22 (0.61) | 0.45 (1.5) | 0.2 (1.09) |
|  |  |  |  |  |  |
| Age |  |  |  |  |  |
| 15 | 0.66 | 1.20 | 0.2 | 0.51 | 0.19 |
| 15.5 | 0.63 (3.4) | 1.19 (1.90) | 0.22 (0.62) | 0.45 (1.49) | 0.177 (0.98) |
| 16 | 0.76 (3.94) | 1.35 (2.05) | 0.22 (0.62) | 0.52 (1.63) | 0.21 (1.14) |
| 16.5 | 0.6 (3.3) | 1.41 (2.09) | 0.25 (0.67) | 0.46 (1.5) | 0.19 (1) |
| 17 | 0.7 (3.76) | 1.57 (2.24) | 0.25 (0.66) | 0.52 (1.65) | 0.22 (1.16) |
| 17.5 | 0.61 (3.38) | 1.52 (2.24) | 0.27 (0.72) | 0.48 (1.56) | 0.22 (1.11) |
| 18 | 0.67 (3.6) | 1.62 (2.33) | 0.27 (0.71) | 0.52 (1.67) | 0.26 (1.28) |
| 18.5 | 0.46 (2.7) | 1.66 (2.42) | 0.3 (0.77) | 0.49 (1.56) | 0.26 (1.24) |
| 19 | 0.46 (2.67) | 1.92 (2.6) | 0.35 (0.84) | 0.54 (1.69) | 0.3 (1.39) |
| 19.5 | 0.35 (2.24) | 1.6 (2.51) | 0.3 (0.79) | 0.48 (1.62) | 0.28 (1.31) |
| 20 | 0.39 (2.47) | 1.7 (2.64) | 0.3 (0.8) | 0.53 (1.75) | 0.31 (1.47) |
| 20.5 | 0.35 (2.25) | 1.67 (2.62) | 0.32 (0.82) | 0.5 (1.68) | 0.31 (1.43) |
| 21 | 0.40 (2.53) | 1.75 (2.7) | 0.31 (0.81) | 0.55 (1.81) | 0.33 (1.56) |
| Parents education |  | |  |  |  |
| Higher | 0.52 (3.13) | 1.47 (2.21) | 0.26 (0.70) | 0.49 (1.61) | 0.22 (1.21) |
| Lower | 0.52 (3.14) | 1.67(2.49) | 0.30 (0.77) | 0.53 (1.66) | 0.28 (1.31) |
| Highest finished education |  | |  |  |  |
| <Finished more than three years | 0.4 (2.7) | 1.49 (2.22) | 0.29 (0.74) | 0.47 (1.53) | 0.2 (1.1) |
| >Finished three years or less | 0.64 (3.41) | 1.61 (2.45) | 0.26 (0.72) | 0.54 (1.71) | 0.29 (1.37) |
| Immigration status |  | |  |  |  |
| Immigrant | 0.34 (2.4) | 1.21 (2.07) | 0.21 (0.63) | 0.41 (1.5) | 0.16 (0.94) |
| Not immigrant | 0.56 (3.18) | 1.59 (2.38) | 0.28 (0.74) | 0.51 (1.65) | 0.26 (1.28) |
| Diagnosis |  |  |  |  |  |
| *Mental diagnosis | 3.55 (7.6) | 4.38 (3.8) | 0.77 (1.41) | 0.92 (2.36) | 2.89 (3.26) |
| *No mental diagnosis | 0.25 (2.1) | 1.29 (1.97) | 0.23 (0.61) | 0.47 (1.54) | 0 |

*Table 1: Descriptive statistics of healthcare contacts from 2008–2021 for 1,313,077 individuals aged 15–21. The table presents the mean (and standard deviation) number of annual contacts with specialist mental health services (Child and Adolescent, Adult, or Contract Specialists), General Practitioners (in-hours and out-of-hours), and somatic or acute somatic services. Values are shown by sex, age, parental education, highest completed education, immigration status, and presence of a mental health diagnosis (P-diagnosis) recorded by a GP. Females had higher contact frequencies across all healthcare services, GP and somatic service use increased modestly with age, while specialist mental health service use peaked at ages 16–17 and declined thereafter. Individuals with a P-diagnosis had substantially higher contact frequencies across all healthcare services compared to those without such a diagnosis.*

*Graph 1: Health care utilization for the whole population aged 16 to 21 years of age, measured in IRR with 15 as reference age as well as the Lower Confidence Interval (LCI) and Upper Confidence Interval (UCI) marked with error bars. Justified for yearly effects and gender. Health care services represented are contacts with the General Practitioner, Out-of-hours General Practitioner, the specialist mental health service, consisting of child and adolescent mental health services, adult mental health services, contract specialists and somatic and acute somatic care.*

| **Primary analysis - Health care service utilization** | | | | | | | | | | | | | |
| --- | --- | --- | --- | --- | --- | --- | --- | --- | --- | --- | --- | --- | --- |
| **Age** |  | **16** | **16.5** | **17** | **17.5** | **18** | **18.5** | **19** | **19.5** | **20** | **20.5** | **21** |  |
| **Overall population** |  |  |  |  |  |  |  |  |  |  |  |  |  |
|  | General Practitioner | 0.92 (0.92-0.92) | 0.96 (0.96-0.97) | 1.05 (1.05-1.05) | 1.01 (1.01-1.01) | 1.04 (1.04-1.04) | 1.07 (1.07-1.08) | 1.21 (1.21-1.22) | 0.99 (0.99-0.99) | 1.02 (1.02-1.02) | 1.00 (1.00-1.00) | 1.02 (1.02-1.03) |  |
|  | Out of hours GP | 0.80 (0.79-0.80) | 0.94 (0.94-0.95) | 0.91 (0.90-0.91) | 1.00 (0.99-1.00) | 0.99 (0.98-0.99) | 1.12 (1.11-1.12) | 1.28 (1.27-1.28) | 1.10 (1.09-1.10) | 1.08 (1.08-1.09) | 1.14 (1.14-1.15) | 1.07 (1.06-1.08) |  |
|  | Specialist Mental Health services | 1.23 (1.22-1.24) | 0.93 (0.92-0.93) | 1.24 (1.23-1.25) | 1.06 (1.05-1.07) | 1.31 (1.30-1.33) | 0.87 (0.86-0.87) | 0.98 (0.98-0.99) | 0.72 (0.71-0.73) | 0.93 (0.93-0.94) | 0.81 (0.80-0.82) | 1.10 (1.09-1.12) |  |
|  | Acute somatic and somatic services | 1.01 (0.99-1.02) | 0.89 (0.87-0.90) | 1.00 (0.98-1.02) | 1.00 (0.98-1.02) | 1.05 (1.03-1.07) | 0.96 (0.94-0.97) | 1.05 (1.04-1.07) | 0.96 (0.95-0.98) | 1.06 (1.05-1.08) | 1.01 (0.99-1.02) | 1.10 (1.08-1.11) |  |
| **Female** | General Practitioner | 0.89 (0.89-0.89) | 0.98 (0.97-0.98) | 1.05 (1.04-1.05) | 1.03 (1.02-1.03) | 1.03 (1.02-1.03) | 1.11 (1.10-1.11) | 1.20 (1.19-1.20) | 1.01 (1.01-1.01) | 1.03 (1.02-1.03) | 1.03 (1.02-1.03) | 1.03 (1.02-1.03) |  |
|  | Out of hours GP | 0.77 (0.76-0.77) | 0.94 (0.93-0.95) | 0.92 (0.91-0.93) | 1.01 (1.00-1.01) | 0.99 (0.98-0.99) | 1.14 (1.13-1.15) | 1.28 (1.27-1.28) | 1.12 (1.11-1.12) | 1.09 (1.08-1.09) | 1.17 (1.16-1.18) | 1.09 (1.08-1.09) |  |
|  | Specialist Mental  Health services | 1.22 (1.20-1.23) | 0.96 (0.95-0.97) | 1.28 (1.27-1.30) | 1.11 (1.10-1.12) | 1.36 (1.35-1.37) | 0.90 (0.89-0.91) | 1.01 (1.00-1.02) | 0.72 (0.71-0.73) | 0.91 (0.89-0.92) | 0.78 (0.77-0.79) | 1.03 (1.01-1.04) |  |
|  | Acute somatic  and Somatic | 1.00 (0.99-1.00) | 0.91 (0.90-0.91) | 1.04 (1.03-1.05) | 0.95 (0.95-0.96) | 1.03 (1.03-1.04) | 0.99 (0.98-1.00) | 1.08 (1.07-1.09) | 0.96 (0.95-0.97) | 1.06 (1.05-1.06) | 1.02 (1.01-1.03) | 1.14 (1.13-1.15) |  |
|  |  |  |  |  |  |  |  |  |  |  |  |  |  |
| **Male** | General Practitioner | 0.96 (0.96-0.97) | 0.95 (0.95-0.95) | 1.05 (1.05-1.06) | 0.98 (0.98-0.98) | 1.06 (1.05-1.06) | 1.02 (1.02-1.03) | 1.24 (1.23-1.24) | 0.95 (0.95-0.95) | 1.01 (1.00-1.01) | 0.95 (0.94-0.95) | 1.01 (1.01-1.02) |  |
|  | Out of hours GP | 0.84 (0.83-0.85) | 0.95 (0.94-0.96) | 0.89 (0.89-0.90) | 0.99 (0.98-1.00) | 0.98 (0.98-0.99) | 1.08 (1.08-1.09) | 1.28 (1.27-1.28) | 1.06 (1.05-1.07) | 1.07 (1.06-1.07) | 1.10 (1.09-1.10) | 1.04 (1.03-1.05) |  |
|  | Specialist Mental  Health services | 1.25 (1.24-1.27) | 0.85 (0.84-0.87) | 1.14 (1.13-1.16) | 0.95 (0.94-0.97) | 1.22 (1.21-1.24) | 0.80 (0.78-0.81) | 0.93 (0.91-0.94) | 0.71 (0.70-0.73) | 1.00 (0.98-1.01) | 0.88 (0.86-0.90) | 1.27 (1.24-1.30) |  |
|  | Acute somatic  and Somatic | 1.10 (1.09-1.11) | 0.95 (0.94-0.96) | 1.07 (1.06-1.08) | 0.95 (0.95-0.96) | 1.04 (1.03-1.05) | 0.95 (0.94-0.96) | 1.06 (1.05-1.07) | 0.91 (0.90-0.92) | 0.99 (0.98-1.00) | 0.91 (0.90-0.92) | 0.99 (0.98-1.00) |  |
|  |  |  |  |  |  |  |  |  |  |  |  |  |  |
| **Higher educated parents** | General Practitioner | 0.89 (0.89-0.89) | 0.98 (0.97-0.98) | 1.05 (1.04-1.05) | 1.03 (1.02-1.03) | 1.03 (1.02-1.03) | 1.11 (1.10-1.11) | 1.20 (1.19-1.20) | 1.01 (1.01-1.01) | 1.03 (1.02-1.03) | 1.03 (1.02-1.03) | 1.03 (1.02-1.03) |  |
|  | Out of hours GP | 0.77 (0.76-0.77) | 0.94 (0.93-0.95) | 0.92 (0.91-0.93) | 1.01 (1.00-1.01) | 0.99 (0.98-0.99) | 1.14 (1.13-1.15) | 1.28 (1.27-1.28) | 1.12 (1.11-1.12) | 1.09 (1.08-1.09) | 1.17 (1.16-1.18) | 1.09 (1.08-1.09) |  |
|  | Specialist Mental  Health services | 1.22 (1.20-1.23) | 0.96 (0.95-0.97) | 1.28 (1.27-1.30) | 1.11 (1.10-1.12) | 1.36 (1.35-1.37) | 0.90 (0.89-0.91) | 1.01 (1.00-1.02) | 0.72 (0.71-0.73) | 0.91 (0.89-0.92) | 0.78 (0.77-0.79) | 1.03 (1.01-1.04) |  |
|  | Acute somatic  and Somatic | 1.00 (0.99-1.00) | 0.91 (0.90-0.91) | 1.04 (1.03-1.05) | 0.95 (0.95-0.96) | 1.03 (1.03-1.04) | 0.99 (0.98-1.00) | 1.08 (1.07-1.09) | 0.96 (0.95-0.97) | 1.06 (1.05-1.06) | 1.02 (1.01-1.03) | 1.14 (1.13-1.15) |  |
|  |  |  |  |  |  |  |  |  |  |  |  |  |  |
| **Lower educated parents** | General Practitioner | 0.96 (0.96-0.97) | 0.95 (0.95-0.95) | 1.05 (1.05-1.06) | 0.98 (0.98-0.98) | 1.06 (1.05-1.06) | 1.02 (1.02-1.03) | 1.24 (1.23-1.24) | 0.95 (0.95-0.95) | 1.01 (1.00-1.01) | 0.95 (0.94-0.95) | 1.01 (1.01-1.02) |  |
|  | Out of hours GP | 0.84 (0.83-0.85) | 0.95 (0.94-0.96) | 0.89 (0.89-0.90) | 0.99 (0.98-1.00) | 0.98 (0.98-0.99) | 1.08 (1.08-1.09) | 1.28 (1.27-1.28) | 1.06 (1.05-1.07) | 1.07 (1.06-1.07) | 1.10 (1.09-1.10) | 1.04 (1.03-1.05) |  |
|  | Specialist Mental  Health services | 1.25 (1.24-1.27) | 0.85 (0.84-0.87) | 1.14 (1.13-1.16) | 0.95 (0.94-0.97) | 1.22 (1.21-1.24) | 0.80 (0.78-0.81) | 0.93 (0.91-0.94) | 0.71 (0.70-0.73) | 1.00 (0.98-1.01) | 0.88 (0.86-0.90) | 1.27 (1.24-1.30) |  |
|  | Acute somatic  and Somatic | 1.10 (1.09-1.11) | 0.95 (0.94-0.96) | 1.07 (1.06-1.08) | 0.95 (0.95-0.96) | 1.04 (1.03-1.05) | 0.95 (0.94-0.96) | 1.06 (1.05-1.07) | 0.91 (0.90-0.92) | 0.99 (0.98-1.00) | 0.91 (0.90-0.92) | 0.99 (0.98-1.00) |  |
|  |  |  |  |  |  |  |  |  |  |  |  |  |  |
| **Mental diagnosis** | General Practitioner | 0.89 (0.89-0.89) | 0.98 (0.97-0.98) | 1.05 (1.04-1.05) | 1.03 (1.02-1.03) | 1.03 (1.02-1.03) | 1.11 (1.10-1.11) | 1.20 (1.19-1.20) | 1.01 (1.01-1.01) | 1.03 (1.02-1.03) | 1.03 (1.02-1.03) | 1.03 (1.02-1.03) |  |
|  | Out of hours GP | 0.77 (0.76-0.77) | 0.94 (0.93-0.95) | 0.92 (0.91-0.93) | 1.01 (1.00-1.01) | 0.99 (0.98-0.99) | 1.14 (1.13-1.15) | 1.28 (1.27-1.28) | 1.12 (1.11-1.12) | 1.09 (1.08-1.09) | 1.17 (1.16-1.18) | 1.09 (1.08-1.09) |  |
|  | Specialist Mental  Health services | 1.22 (1.20-1.23) | 0.96 (0.95-0.97) | 1.28 (1.27-1.30) | 1.11 (1.10-1.12) | 1.36 (1.35-1.37) | 0.90 (0.89-0.91) | 1.01 (1.00-1.02) | 0.72 (0.71-0.73) | 0.91 (0.89-0.92) | 0.78 (0.77-0.79) | 1.03 (1.01-1.04) |  |
|  | Acute somatic  and Somatic | 1.00 (0.99-1.00) | 0.91 (0.90-0.91) | 1.04 (1.03-1.05) | 0.95 (0.95-0.96) | 1.03 (1.03-1.04) | 0.99 (0.98-1.00) | 1.08 (1.07-1.09) | 0.96 (0.95-0.97) | 1.06 (1.05-1.06) | 1.02 (1.01-1.03) | 1.14 (1.13-1.15) |  |
|  |  |  |  |  |  |  |  |  |  |  |  |  |  |
| **No mental diagnosis** | General Practitioner | 0.96 (0.96-0.97) | 0.95 (0.95-0.95) | 1.05 (1.05-1.06) | 0.98 (0.98-0.98) | 1.06 (1.05-1.06) | 1.02 (1.02-1.03) | 1.24 (1.23-1.24) | 0.95 (0.95-0.95) | 1.01 (1.00-1.01) | 0.95 (0.94-0.95) | 1.01 (1.01-1.02) |  |
|  | Out of hours GP | 0.84 (0.83-0.85) | 0.95 (0.94-0.96) | 0.89 (0.89-0.90) | 0.99 (0.98-1.00) | 0.98 (0.98-0.99) | 1.08 (1.08-1.09) | 1.28 (1.27-1.28) | 1.06 (1.05-1.07) | 1.07 (1.06-1.07) | 1.10 (1.09-1.10) | 1.04 (1.03-1.05) |  |
|  | Specialist Mental  Health services | 1.25 (1.24-1.27) | 0.85 (0.84-0.87) | 1.14 (1.13-1.16) | 0.95 (0.94-0.97) | 1.22 (1.21-1.24) | 0.80 (0.78-0.81) | 0.93 (0.91-0.94) | 0.71 (0.70-0.73) | 1.00 (0.98-1.01) | 0.88 (0.86-0.90) | 1.27 (1.24-1.30) |  |
|  | Acute somatic  and Somatic | 1.10 (1.09-1.11) | 0.95 (0.94-0.96) | 1.07 (1.06-1.08) | 0.95 (0.95-0.96) | 1.04 (1.03-1.05) | 0.95 (0.94-0.96) | 1.06 (1.05-1.07) | 0.91 (0.90-0.92) | 0.99 (0.98-1.00) | 0.91 (0.90-0.92) | 0.99 (0.98-1.00) |  |
|  |  |  |  |  |  |  |  |  |  |  |  |  |  |
| **Higher education** | General Practitioner | 0.89 (0.89-0.89) | 0.98 (0.97-0.98) | 1.05 (1.04-1.05) | 1.03 (1.02-1.03) | 1.03 (1.02-1.03) | 1.11 (1.10-1.11) | 1.20 (1.19-1.20) | 1.01 (1.01-1.01) | 1.03 (1.02-1.03) | 1.03 (1.02-1.03) | 1.03 (1.02-1.03) |  |
|  | Out of hours GP | 0.77 (0.76-0.77) | 0.94 (0.93-0.95) | 0.92 (0.91-0.93) | 1.01 (1.00-1.01) | 0.99 (0.98-0.99) | 1.14 (1.13-1.15) | 1.28 (1.27-1.28) | 1.12 (1.11-1.12) | 1.09 (1.08-1.09) | 1.17 (1.16-1.18) | 1.09 (1.08-1.09) |  |
|  | Specialist Mental  Health services | 1.22 (1.20-1.23) | 0.96 (0.95-0.97) | 1.28 (1.27-1.30) | 1.11 (1.10-1.12) | 1.36 (1.35-1.37) | 0.90 (0.89-0.91) | 1.01 (1.00-1.02) | 0.72 (0.71-0.73) | 0.91 (0.89-0.92) | 0.78 (0.77-0.79) | 1.03 (1.01-1.04) |  |
|  | Acute somatic  and Somatic | 1.00 (0.99-1.00) | 0.91 (0.90-0.91) | 1.04 (1.03-1.05) | 0.95 (0.95-0.96) | 1.03 (1.03-1.04) | 0.99 (0.98-1.00) | 1.08 (1.07-1.09) | 0.96 (0.95-0.97) | 1.06 (1.05-1.06) | 1.02 (1.01-1.03) | 1.14 (1.13-1.15) |  |
|  |  |  |  |  |  |  |  |  |  |  |  |  |  |
| **Lower education** | General Practitioner | 0.96 (0.96-0.97) | 0.95 (0.95-0.95) | 1.05 (1.05-1.06) | 0.98 (0.98-0.98) | 1.06 (1.05-1.06) | 1.02 (1.02-1.03) | 1.24 (1.23-1.24) | 0.95 (0.95-0.95) | 1.01 (1.00-1.01) | 0.95 (0.94-0.95) | 1.01 (1.01-1.02) |  |
|  | Out of hours GP | 0.84 (0.83-0.85) | 0.95 (0.94-0.96) | 0.89 (0.89-0.90) | 0.99 (0.98-1.00) | 0.98 (0.98-0.99) | 1.08 (1.08-1.09) | 1.28 (1.27-1.28) | 1.06 (1.05-1.07) | 1.07 (1.06-1.07) | 1.10 (1.09-1.10) | 1.04 (1.03-1.05) |  |
|  | Specialist Mental  Health services | 1.25 (1.24-1.27) | 0.85 (0.84-0.87) | 1.14 (1.13-1.16) | 0.95 (0.94-0.97) | 1.22 (1.21-1.24) | 0.80 (0.78-0.81) | 0.93 (0.91-0.94) | 0.71 (0.70-0.73) | 1.00 (0.98-1.01) | 0.88 (0.86-0.90) | 1.27 (1.24-1.30) |  |
|  | Acute somatic  and Somatic | 1.10 (1.09-1.11) | 0.95 (0.94-0.96) | 1.07 (1.06-1.08) | 0.95 (0.95-0.96) | 1.04 (1.03-1.05) | 0.95 (0.94-0.96) | 1.06 (1.05-1.07) | 0.91 (0.90-0.92) | 0.99 (0.98-1.00) | 0.91 (0.90-0.92) | 0.99 (0.98-1.00) |  |
|  |  |  |  |  |  |  |  |  |  |  |  |  |  |
| **Foreign born** | General Practitioner | 0.89 (0.89-0.89) | 0.98 (0.97-0.98) | 1.05 (1.04-1.05) | 1.03 (1.02-1.03) | 1.03 (1.02-1.03) | 1.11 (1.10-1.11) | 1.20 (1.19-1.20) | 1.01 (1.01-1.01) | 1.03 (1.02-1.03) | 1.03 (1.02-1.03) | 1.03 (1.02-1.03) |  |
|  | Out of hours GP | 0.77 (0.76-0.77) | 0.94 (0.93-0.95) | 0.92 (0.91-0.93) | 1.01 (1.00-1.01) | 0.99 (0.98-0.99) | 1.14 (1.13-1.15) | 1.28 (1.27-1.28) | 1.12 (1.11-1.12) | 1.09 (1.08-1.09) | 1.17 (1.16-1.18) | 1.09 (1.08-1.09) |  |
|  | Specialist Mental  Health services | 1.22 (1.20-1.23) | 0.96 (0.95-0.97) | 1.28 (1.27-1.30) | 1.11 (1.10-1.12) | 1.36 (1.35-1.37) | 0.90 (0.89-0.91) | 1.01 (1.00-1.02) | 0.72 (0.71-0.73) | 0.91 (0.89-0.92) | 0.78 (0.77-0.79) | 1.03 (1.01-1.04) |  |
|  | Acute somatic  and Somatic | 1.00 (0.99-1.00) | 0.91 (0.90-0.91) | 1.04 (1.03-1.05) | 0.95 (0.95-0.96) | 1.03 (1.03-1.04) | 0.99 (0.98-1.00) | 1.08 (1.07-1.09) | 0.96 (0.95-0.97) | 1.06 (1.05-1.06) | 1.02 (1.01-1.03) | 1.14 (1.13-1.15) |  |
|  |  |  |  |  |  |  |  |  |  |  |  |  |  |
| **Norwegian born** | General Practitioner | 0.96 (0.96-0.97) | 0.95 (0.95-0.95) | 1.05 (1.05-1.06) | 0.98 (0.98-0.98) | 1.06 (1.05-1.06) | 1.02 (1.02-1.03) | 1.24 (1.23-1.24) | 0.95 (0.95-0.95) | 1.01 (1.00-1.01) | 0.95 (0.94-0.95) | 1.01 (1.01-1.02) |  |
|  | Out of hours GP | 0.84 (0.83-0.85) | 0.95 (0.94-0.96) | 0.89 (0.89-0.90) | 0.99 (0.98-1.00) | 0.98 (0.98-0.99) | 1.08 (1.08-1.09) | 1.28 (1.27-1.28) | 1.06 (1.05-1.07) | 1.07 (1.06-1.07) | 1.10 (1.09-1.10) | 1.04 (1.03-1.05) |  |
|  | Specialist Mental  Health services | 1.25 (1.24-1.27) | 0.85 (0.84-0.87) | 1.14 (1.13-1.16) | 0.95 (0.94-0.97) | 1.22 (1.21-1.24) | 0.80 (0.78-0.81) | 0.93 (0.91-0.94) | 0.71 (0.70-0.73) | 1.00 (0.98-1.01) | 0.88 (0.86-0.90) | 1.27 (1.24-1.30) |  |
|  | Acute somatic  and Somatic | 1.10 (1.09-1.11) | 0.95 (0.94-0.96) | 1.07 (1.06-1.08) | 0.95 (0.95-0.96) | 1.04 (1.03-1.05) | 0.95 (0.94-0.96) | 1.06 (1.05-1.07) | 0.91 (0.90-0.92) | 0.99 (0.98-1.00) | 0.91 (0.90-0.92) | 0.99 (0.98-1.00) |  |

*Table 2: Incidence Rate Ratios (IRR) with 95% Confidence Intervals for health care utilization among individuals aged 16–21, using age 15 as the reference group. Estimates are adjusted for yearly effects and gender. Health care services include contacts with General Practitioners (GPs), Out-of-hours GPs, specialist mental health services (Child and Adolescent Mental Health Services, Adult Mental Health Services, and Contract Specialists), as well as somatic and acute somatic care. Results are also presented by parental education level, distinguishing between higher-educated parents and lower educated parents.*

*Graph 3 and 4: Utilization (IRR and CI) of healthcare services including General Practitioners, Out-of-Hours GPs, specialist mental health services*
*(child and adolescent mental health services, adult mental health services, and contracted specialists), and acute somatic services among*
*individuals with and without a P diagnosis given by a GP before age 21. The Incidence Rate Ratio (IRR) is plotted on the y-axis relative to age 15, while age*
*is represented on the x-axis in half-year intervals*

| **Subgroup analysis 1 - Health Care Utilization for the ones with P-diagnosis** | | | | | | | | | | | | |  |
| --- | --- | --- | --- | --- | --- | --- | --- | --- | --- | --- | --- | --- | --- |
| **P-diagnosis** |  | **16** | **16.5** | **17** | **17.5** | **18** | **18.5** | **19** | **19.5** | **20** | **20.5** | **21** |  |
|  | General Practitioner | 0.92 (0.91-0.92) | 0.95 (0.94-0.95) | 1.02 (1.02-1.02) | 1.01 (1.00-1.01) | 1.03 (1.02-1.03) | 1.07 (1.07-1.07) | 1.14 (1.14-1.15) | 1.02 (1.01-1.02) | 1.05 (1.04-1.05) | 1.03 (1.03-1.04) | 1.05 (1.04-1.05) |  |
|  | Out of hours GP | 0.79 (0.78-0.80) | 0.89 (0.88-0.90) | 0.90 (0.89-0.90) | 0.97 (0.96-0.98) | 0.99 (0.98-0.99) | 1.12 (1.11-1.13) | 1.22 (1.21-1.23) | 1.14 (1.13-1.14) | 1.12 (1.11-1.13) | 1.18 (1.17-1.19) | 1.12 (1.11-1.13) |  |
|  | Specialist Mental Health Services | 1.23 (1.22-1.24) | 0.94 (0.93-0.95) | 1.24 (1.23-1.25) | 1.07 (1.06-1.07) | 1.31 (1.30-1.32) | 0.87 (0.86-0.88) | 0.98 (0.97-0.99) | 0.73 (0.72-0.73) | 0.94 (0.93-0.95) | 0.82 (0.81-0.83) | 1.10 (1.09-1.12) |  |
|  | Acute somatic  And somatics | 1.02 (1.01-1.03) | 0.91 (0.90-0.92) | 1.04 (1.03-1.04) | 0.96 (0.95-0.97) | 1.04 (1.03-1.05) | 0.98 (0.97-0.98) | 1.07 (1.06-1.08) | 0.97 (0.96-0.98) | 1.05 (1.04-1.06) | 1.00 (0.99-1.01) | 1.09 (1.08-1.10) |  |
|  |  |  |  |  |  |  |  |  |  |  |  |  |  |
| **No P diagnosis** | General Practitioner | 0.91 (0.90-0.91) | 0.97 (0.96-0.97) | 1.06 (1.06-1.07) | 1.00 (0.99-1.00) | 1.04 (1.04-1.05) | 1.07 (1.07-1.07) | 1.29 (1.29-1.29) | 0.96 (0.96-0.96) | 1.01 (1.01-1.01) | 0.98 (0.98-0.98) | 1.04 (1.04-1.05) |  |
|  | Out of hours GP | 0.80 (0.79-0.80) | 0.99 (0.98-0.99) | 0.91 (0.90-0.92) | 1.02 (1.01-1.02) | 0.97 (0.97-0.98) | 1.10 (1.09-1.11) | 1.33 (1.32-1.34) | 1.05 (1.04-1.05) | 1.05 (1.05-1.06) | 1.11 (1.10-1.12) | 1.06 (1.05-1.07) |  |
|  | Specialist Mental Health Services | 1.23 (1.20-1.26) | 0.75 (0.73-0.78) | 1.27 (1.23-1.31) | 0.95 (0.92-0.99) | 1.47 (1.42-1.53) | 0.77 (0.74-0.81) | 1.04 (0.99-1.09) | 0.53 (0.50-0.56) | 0.82 (0.78-0.87) | 0.57 (0.54-0.61) | 1.08 (1.00-1.16) |  |
|  | Acute somatic  And somatics | 1.06 (1.05-1.07) | 0.94 (0.93-0.95) | 1.07 (1.06-1.07) | 0.94 (0.94-0.95) | 1.03 (1.02-1.04) | 0.96 (0.95-0.97) | 1.07 (1.06-1.08) | 0.91 (0.91-0.92) | 1.01 (1.00-1.02) | 0.96 (0.95-0.96) | 1.08 (1.07-1.09) |  |

*Table 3: Health care utilization in IRR for the population given one or more p-diagnosis at the GP or Out-of-hour GP (N=372.108) and the ones not having any p-diagnosis. The Incidence rate ratio is measured as relative to the age of 15.*

*Graph 5: Healthcare utilization visualized with IRR over age for the adolescents with one or more contacts in CAMHS the year they turned 17, with 15 as reference age. Health care services represented are contacts with the General Practitioner, Out-of-hours General Practitioner. The specialist mental health services being the child and adolescent mental health services, adult mental health services and the Contract specialists and somatic and acute somatic care.*

| **Subgroup analysis 2 - Mental health utilization for the population with one or more contacts in child and adolescent mental health services the year they turned 17** | | | | | | | | | | | | |  | **16** | **16.5** | **17** | **17.5** | **18** | **18.5** | **19** | **19.5** | **20** | **20.5** | **21** |
| --- | --- | --- | --- | --- | --- | --- | --- | --- | --- | --- | --- | --- | --- | --- | --- | --- | --- | --- | --- | --- | --- | --- | --- | --- |
| **Age** |  | **16** | **16.5** | **17** | **17.5** | **18** | **18.5** | **19** | **19.5** | **20** | **20.5** | **21** |
| **Overall population** |  |  |  |  |  |  |  |  |  |  |  |  |
|  | General Practitioner | 0.96 (0.96-0.97) | 1.05 (1.04-1.06) | 1.13 (1.12-1.13) | 1.1 (1.09-1.1) | 1.01 (1.00-1.02) | 1.04 (1.04-1.05) | 1.06 (1.05-1.07) | 0.99 (0.99-1.00) | 1.00 (0.99-1.00) | 0.98 (0.97-0.99) | 0.96 (0.95-0.97) |
|  | Out of hours GP | 0.85 (0.83-0.86) | 0.99 (0.97-1.01) | 1.04 (1.03-1.06) | 1.1 (1.08-1.12) | 1.02 (1.00-1.03) | 1.11 (1.1-1.13) | 1.13 (1.11-1.15) | 1.09 (1.07-1.11) | 1.04 (1.02-1.06) | 1.06 (1.04-1.08) | 0.99 (0.96-1.01) |
|  | Specialist Mental Health Services | 1.12 (1.11-1.13) | 1.09 (1.08-1.10) | 1.77 (1.76-1.79) | 1.49 (1.48-1.51) | 1.58 (1.56-1.59) | 0.81 (0.80-0.82) | 0.84 (0.83-0.85) | 0.57 (0.56-0.58) | 0.71 (0.70-0.73) | 0.58 (0.57-0.59) | 0.74 (0.73-0.76) |
|  | Acute somatic and somatic | 1.01 (1.00-1.03) | 0.98 (0.96-1.00) | 1.13 (1.12-1.15) | 1.06 (1.04-1.08) | 1.08 (1.06-1.09) | 0.97 (0.96-0.99) | 1.02 (1.01-1.04) | 0.94 (0.92-0.96) | 1.00 (0.98-1.02) | 0.94 (0.92-0.96) | 1.03 (1.00-1.05) |
| **Female** | General practitioner | 0.96 (0.95-0.97) | 1.06 (1.05-1.07) | 1.12 (1.11-1.13) | 1.10 (1.09-1.11) | 1.00 (1.00-1.01) | 1.06 (1.05-1.07) | 1.07 (1.06-1.08) | 1.01 (1.00-1.02) | 1.00 (0.99-1.01) | 0.99 (0.98-1.00) | 0.95 (0.94-0.97) |
|  | Out-of-hours-services | 0.84 (0.82-0.86) | 1.00 (0.98-1.02) | 1.04 (1.02-1.06) | 1.09 (1.07-1.11) | 1.02 (1.00-1.04) | 1.12 (1.10-1.14) | 1.14 (1.12-1.16) | 1.11 (1.09-1.13) | 1.04 (1.01-1.06) | 1.06 (1.03-1.08) | 0.97 (0.94-1.01) |
|  | Specialist Mental  Health services | 1.11 (1.10-1.13) | 1.11 (1.09-1.12) | 1.75 (1.74-1.77) | 1.50 (1.48-1.51) | 1.58 (1.56-1.60) | 0.83 (0.82-0.84) | 0.86 (0.85-0.87) | 0.59 (0.58-0.60) | 0.72 (0.71-0.74) | 0.58 (0.57-0.60) | 0.74 (0.72-0.76) |
|  | Acute somatic and somatic care | 0.99 (0.97-1.01) | 0.98 (0.96-1.00) | 1.12 (1.10-1.14) | 1.05 (1.03-1.07) | 1.08 (1.05-1.10) | 0.99 (0.97-1.01) | 1.03 (1.01-1.06) | 0.96 (0.94-0.98) | 1.02 (1.00-1.04) | 0.96 (0.94-0.98) | 1.04 (1.01-1.07) |
|  |  |  |  |  |  |  |  |  |  |  |  |  |
| **Male** | General practitioner | 0.99 (0.97-1.00) | 1.02 (1.01-1.04) | 1.15 (1.13-1.16) | 1.10 (1.08-1.11) | 1.04 (1.02-1.05) | 0.99 (0.98-1.01) | 1.04 (1.03-1.06) | 0.94 (0.93-0.96) | 1.01 (0.99-1.02) | 0.95 (0.93-0.96) | 0.98 (0.96-0.99) |
|  | Out-of-hours-services | 0.87 (0.84-0.90) | 0.97 (0.94-0.99) | 1.05 (1.02-1.08) | 1.12 (1.09-1.15) | 1.01 (0.99-1.04) | 1.08 (1.05-1.11) | 1.10 (1.07-1.13) | 1.03 (1.00-1.06) | 1.04 (1.01-1.07) | 1.06 (1.03-1.09) | 1.01 (0.98-1.05) |
|  | Specialist Mental  Health services | 1.15 (1.13-1.17) | 1.07 (1.05-1.09) | 1.81 (1.79-1.84) | 1.49 (1.46-1.51) | 1.57 (1.54-1.60) | 0.75 (0.74-0.77) | 0.77 (0.75-0.79) | 0.52 (0.51-0.54) | 0.69 (0.67-0.71) | 0.56 (0.54-0.58) | 0.74 (0.71-0.77) |
|  | Acute somatic and somatic care | 1.07 (1.04-1.10) | 0.98 (0.95-1.01) | 1.16 (1.13-1.19) | 1.08 (1.04-1.11) | 1.09 (1.06-1.13) | 0.95 (0.92-0.97) | 0.99 (0.96-1.03) | 0.88 (0.85-0.90) | 0.95 (0.92-0.99) | 0.88 (0.85-0.92) | 0.98 (0.94-1.02) |
|  |  |  |  |  |  |  |  |  |  |  |  |  |
| **Higher educated parents** | General practitioner | 0.97 (0.96-0.98) | 1.07 (1.05-1.08) | 1.16 (1.14-1.17) | 1.11 (1.10-1.12) | 1.02 (1.01-1.03) | 1.05 (1.04-1.06) | 1.08 (1.07-1.10) | 0.97 (0.96-0.98) | 0.99 (0.97-1.00) | 0.96 (0.95-0.97) | 0.95 (0.93-0.97) |
|  | Out-of-hours-services | 0.86 (0.83-0.88) | 0.99 (0.96-1.01) | 1.04 (1.02-1.06) | 1.11 (1.09-1.14) | 1.01 (0.99-1.03) | 1.11 (1.08-1.13) | 1.14 (1.11-1.17) | 1.06 (1.04-1.09) | 1.04 (1.01-1.07) | 1.06 (1.03-1.09) | 0.99 (0.96-1.03) |
|  | Specialist Mental  Health services | 1.11 (1.10-1.13) | 1.10 (1.08-1.11) | 1.77 (1.75-1.79) | 1.51 (1.49-1.53) | 1.60 (1.58-1.63) | 0.82 (0.81-0.84) | 0.86 (0.84-0.87) | 0.56 (0.55-0.58) | 0.69 (0.67-0.70) | 0.56 (0.55-0.58) | 0.71 (0.69-0.74) |
|  | Acute somatic and somatic care | 1.02 (0.99-1.04) | 0.99 (0.96-1.02) | 1.15 (1.12-1.18) | 1.06 (1.04-1.09) | 1.08 (1.06-1.11) | 0.96 (0.93-0.98) | 1.03 (1.00-1.06) | 0.90 (0.88-0.93) | 1.00 (0.97-1.03) | 0.91 (0.88-0.94) | 1.03 (0.99-1.06) |
|  |  |  |  |  |  |  |  |  |  |  |  |  |
| **Lower educated parents** | General practitioner | 0.97 (0.95-0.98) | 1.04 (1.03-1.05) | 1.10 (1.09-1.11) | 1.09 (1.08-1.10) | 1.01 (1.00-1.02) | 1.04 (1.03-1.05) | 1.05 (1.04-1.06) | 1.01 (1.00-1.02) | 1.01 (1.00-1.02) | 1.00 (0.99-1.01) | 0.97 (0.95-0.98) |
|  | Out-of-hours-services | 0.84 (0.82-0.86) | 1.00 (0.98-1.02) | 1.04 (1.02-1.06) | 1.09 (1.07-1.11) | 1.02 (1.00-1.04) | 1.12 (1.10-1.14) | 1.12 (1.10-1.14) | 1.11 (1.09-1.13) | 1.03 (1.01-1.06) | 1.05 (1.03-1.08) | 0.97 (0.94-1.00) |
|  | Specialist Mental  Health services | 1.14 (1.12-1.15) | 1.09 (1.08-1.10) | 1.76 (1.74-1.78) | 1.47 (1.46-1.49) | 1.55 (1.53-1.57) | 0.79 (0.78-0.81) | 0.82 (0.81-0.84) | 0.58 (0.57-0.60) | 0.74 (0.73-0.76) | 0.60 (0.58-0.61) | 0.77 (0.75-0.79) |
|  | Acute somatic and somatic care | 1.01 (0.98-1.03) | 0.97 (0.95-1.00) | 1.12 (1.10-1.14) | 1.05 (1.03-1.08) | 1.08 (1.05-1.10) | 0.99 (0.97-1.01) | 1.02 (1.00-1.04) | 0.96 (0.94-0.98) | 1.00 (0.98-1.03) | 0.96 (0.94-0.98) | 1.02 (0.99-1.05) |
|  |  |  |  |  |  |  |  |  |  |  |  |  |
| **P-diagnosis** | General practitioner | 0.92 (0.91-0.92) | 0.95 (0.94-0.95) | 1.02 (1.02-1.02) | 1.01 (1.00-1.01) | 1.03 (1.02-1.03) | 1.07 (1.07-1.07) | 1.14 (1.14-1.15) | 1.02 (1.01-1.02) | 1.05 (1.04-1.05) | 1.03 (1.03-1.04) | 1.05 (1.04-1.05) |
|  | Out-of-hours GP | 0.79 (0.78-0.80) | 0.89 (0.88-0.90) | 0.90 (0.89-0.90) | 0.97 (0.96-0.98) | 0.99 (0.98-0.99) | 1.12 (1.11-1.13) | 1.22 (1.21-1.23) | 1.14 (1.13-1.14) | 1.12 (1.11-1.13) | 1.18 (1.17-1.19) | 1.12 (1.11-1.13) |
|  | Specialist Mental  Health services | 1.23 (1.22-1.24) | 0.94 (0.93-0.95) | 1.24 (1.23-1.25) | 1.07 (1.06-1.07) | 1.31 (1.30-1.32) | 0.87 (0.86-0.88) | 0.98 (0.97-0.99) | 0.73 (0.72-0.73) | 0.94 (0.93-0.95) | 0.82 (0.81-0.83) | 1.10 (1.09-1.12) |
|  | Acute somatic and somatic care | 1.02 (1.01-1.03) | 0.91 (0.90-0.92) | 1.04 (1.03-1.04) | 0.96 (0.95-0.97) | 1.04 (1.03-1.05) | 0.98 (0.97-0.98) | 1.07 (1.06-1.08) | 0.97 (0.96-0.98) | 1.05 (1.04-1.06) | 1.00 (0.99-1.01) | 1.09 (1.08-1.10) |
|  |  |  |  |  |  |  |  |  |  |  |  |  |
| **No P-diagnosis** | General practitioner | 0.91 (0.90-0.91) | 0.97 (0.96-0.97) | 1.06 (1.06-1.07) | 1.00 (0.99-1.00) | 1.04 (1.04-1.05) | 1.07 (1.07-1.07) | 1.29 (1.29-1.29) | 0.96 (0.96-0.96) | 1.01 (1.01-1.01) | 0.98 (0.98-0.98) | 1.04 (1.04-1.05) |
|  | Out-of-hours GP | 0.80 (0.79-0.80) | 0.99 (0.98-0.99) | 0.91 (0.90-0.92) | 1.02 (1.01-1.02) | 0.97 (0.97-0.98) | 1.10 (1.09-1.11) | 1.33 (1.32-1.34) | 1.05 (1.04-1.05) | 1.05 (1.05-1.06) | 1.11 (1.10-1.12) | 1.06 (1.05-1.07) |
|  | Specialist Mental  Health services | 1.23 (1.20-1.26) | 0.75 (0.73-0.78) | 1.27 (1.23-1.31) | 0.95 (0.92-0.99) | 1.47 (1.42-1.53) | 0.77 (0.74-0.81) | 1.04 (0.99-1.09) | 0.53 (0.50-0.56) | 0.82 (0.78-0.87) | 0.57 (0.54-0.61) | 1.08 (1.00-1.16) |
|  | Acute somatic and somatic care | 1.06 (1.05-1.07) | 0.94 (0.93-0.95) | 1.07 (1.06-1.07) | 0.94 (0.94-0.95) | 1.03 (1.02-1.04) | 0.96 (0.95-0.97) | 1.07 (1.06-1.08) | 0.91 (0.91-0.92) | 1.01 (1.00-1.02) | 0.96 (0.95-0.96) | 1.08 (1.07-1.09) |
|  |  |  |  |  |  |  |  |  |  |  |  |  |
| **Higher Education** | General practitioner | 1.03 (0.98-1.08) | 1.13 (1.07-1.18) | 1.02 (0.99-1.04) | 1.04 (1.02-1.07) | 0.99 (0.97-1.01) | 1.03 (1.01-1.05) | 1.18 (1.17-1.20) | 0.94 (0.93-0.95) | 1.04 (1.02-1.05) | 0.99 (0.98-1.00) | 1.04 (1.03-1.06) |
|  | Out-of-hours GP | 1.17 (1.07-1.28) | 0.88 (0.85-0.92) | 1.11 (1.07-1.15) | 0.91 (0.88-0.95) | 1.06 (1.02-1.11) | 1.12 (1.09-1.15) | 1.00 (0.98-1.03) | 1.03 (1.01-1.05) | 1.08 (1.06-1.11) | 1.06 (1.04-1.09) | 1.05 (1.03-1.06) |
|  | Specialist Mental  Health services | 1.32 (1.24-1.40) | 1.38 (1.33-1.42) | 1.04 (1.01-1.07) | 1.75 (1.69-1.81) | 0.60 (0.58-0.62) | 1.33 (1.29-1.37) | 0.67 (0.65-0.69) | 0.95 (0.93-0.98) | 0.73 (0.71-0.76) | 0.98 (0.94-1.02) | 0.92 (0.90-0.94) |
|  | Acute somatic and somatic care | 0.99 (0.91-1.09) | 1.12 (1.06-1.18) | 1.00 (0.94-1.06) | 1.11 (1.05-1.17) | 0.98 (0.93-1.04) | 1.03 (1.00-1.07) | 0.87 (0.85-0.90) | 0.99 (0.96-1.03) | 0.93 (0.90-0.96) | 1.10 (1.07-1.14) | 0.97 (0.85-1.10) |
|  |  |  |  |  |  |  |  |  |  |  |  |  |
| **Lower Education** | General practitioner | 0.96 (0.95-0.97) | 1.06 (1.05-1.07) | 1.03 (1.02-1.03) | 0.97 (0.96-0.97) | 0.99 (0.99-1.00) | 1.04 (1.03-1.05) | 1.02 (1.01-1.03) | 1.04 (1.03-1.05) | 1.04 (1.03-1.05) | 1.04 (1.02-1.05) | 0.72 (0.51-1.01) |
|  | Out-of-hours GP | 0.90 (0.88-0.91) | 0.98 (0.96-0.99) | 1.01 (1.00-1.03) | 0.97 (0.96-0.99) | 1.06 (1.04-1.07) | 1.12 (1.10-1.14) | 1.11 (1.09-1.13) | 1.09 (1.07-1.11) | 1.09 (1.07-1.11) | 1.07 (1.04-1.10) | 0.61 (0.51-0.73) |
|  | Specialist Mental  Health services | 0.79 (0.79-0.80) | 1.48 (1.46-1.49) | 1.23 (1.22-1.24) | 1.42 (1.41-1.44) | 0.72 (0.71-0.73) | 0.85 (0.84-0.86) | 0.62 (0.60-0.63) | 0.86 (0.85-0.88) | 0.70 (0.69-0.71) | 0.99 (0.96-1.02) | 0.67 (0.52-0.87) |
|  | Acute somatic and somatic care | 0.96 (0.94-0.98) | 0.93 (0.91-0.94) | 1.09 (1.08-1.11) | 1.02 (1.00-1.04) | 1.04 (1.02-1.06) | 0.94 (0.92-0.95) | 1.03 (1.01-1.05) | 0.96 (0.94-0.98) | 1.04 (1.02-1.07) | 0.98 (0.95-1.00) | 1.05 (1.02-1.08) |
|  |  |  |  |  |  |  |  |  |  |  |  |  |
| **Foreign born** | General practitioner | 0.97 (0.95-0.99) | 1.07 (1.05-1.09) | 1.15 (1.13-1.18) | 1.13 (1.11-1.16) | 1.02 (1.00-1.04) | 1.04 (1.02-1.06) | 1.04 (1.02-1.06) | 0.96 (0.94-0.98) | 0.99 (0.97-1.01) | 0.97 (0.95-0.99) | 0.96 (0.93-0.99) |
|  | Out-of-hours GP | 0.88 (0.84-0.93) | 1.02 (0.98-1.07) | 1.08 (1.04-1.12) | 1.16 (1.12-1.20) | 0.98 (0.94-1.02) | 1.09 (1.05-1.13) | 1.06 (1.02-1.11) | 1.03 (0.98-1.07) | 1.04 (0.99-1.09) | 1.07 (1.02-1.12) | 1.02 (0.96-1.08) |
|  | Specialist Mental  Health services | 1.09 (1.06-1.12) | 1.10 (1.07-1.12) | 1.81 (1.77-1.85) | 1.53 (1.49-1.56) | 1.60 (1.56-1.64) | 0.81 (0.79-0.84) | 0.82 (0.79-0.85) | 0.56 (0.53-0.58) | 0.68 (0.65-0.71) | 0.54 (0.51-0.57) | 0.68 (0.64-0.72) |
|  | Acute somatic and somatic care | 1.06 (1.01-1.11) | 1.00 (0.95-1.04) | 1.15 (1.11-1.20) | 1.08 (1.03-1.13) | 1.09 (1.04-1.13) | 0.97 (0.92-1.01) | 1.00 (0.95-1.05) | 0.88 (0.84-0.92) | 0.95 (0.90-1.00) | 0.91 (0.87-0.96) | 1.10 (1.03-1.18) |
|  |  |  |  |  |  |  |  |  |  |  |  |  |
| **Norwegian born** | General practitioner | 0.96 (0.95-0.97) | 1.05 (1.04-1.06) | 1.12 (1.11-1.13) | 1.09 (1.08-1.10) | 1.01 (1.00-1.02) | 1.05 (1.04-1.05) | 1.07 (1.06-1.07) | 1.00 (0.99-1.01) | 1.00 (0.99-1.01) | 0.98 (0.97-0.99) | 0.96 (0.95-0.97) |
|  | Out-of-hours GP | 0.84 (0.82-0.85) | 0.98 (0.97-1.00) | 1.04 (1.02-1.05) | 1.08 (1.07-1.10) | 1.02 (1.01-1.04) | 1.12 (1.10-1.14) | 1.14 (1.13-1.16) | 1.10 (1.08-1.12) | 1.04 (1.02-1.06) | 1.05 (1.03-1.07) | 0.98 (0.95-1.01) |
|  | Specialist Mental Health services | 1.13 (1.12-1.14) | 1.10 (1.08-1.11) | 1.76 (1.75-1.78) | 1.49 (1.47-1.50) | 1.57 (1.55-1.58) | 0.80 (0.79-0.81) | 0.84 (0.83-0.85) | 0.58 (0.57-0.59) | 0.72 (0.71-0.74) | 0.59 (0.58-0.60) | 0.75 (0.74-0.77) |
|  | Acute somatic and somatic care | 1.00 (0.98-1.02) | 0.98 (0.96-1.00) | 1.13 (1.11-1.15) | 1.05 (1.03-1.07) | 1.08 (1.06-1.10) | 0.98 (0.96-1.00) | 1.02 (1.00-1.04) | 0.95 (0.93-0.97) | 1.01 (0.99-1.03) | 0.95 (0.93-0.97) | 1.02 (0.99-1.04) |

*Table 5: Incidence Rate Ratios (IRR) for overall health service utilization among individuals with one or more contacts in Child and Adolescent Mental Health Services (CAMHS) during the year they turned 17 (N = 71,779), covering ages 15–21, with age 15 as the reference group. Health care services include contacts with General Practitioners (GPs), Out-of-hours GPs, specialist mental health services (CAMHS, Adult Mental Health Services, and Contract Specialists), as well as somatic and acute somatic care.*
